# Supplementary material for: Two Gold Kiwifruit Daily for Effective Treatment of Constipation in Adults—A Randomized Clinical Trial
Source: MDPI journal article supplement (doi:10.3390/nu14194146), 2022-10-06
Supplement: s1 [file s1]

**Supplemental Table S2** Adverse events. Total counts, details, and follow up information<sup>a</sup>

| Phase (n)<br>[statistical<br>significance] <sup>b</sup> | Serious/<br>Non-serious<br>(n)         | Possibly<br>intervention<br>related<br>[statistical<br>significance] | Details (n)<br>[statistical significance]            | Withdrawals | Recovered                           |
|---------------------------------------------------------|----------------------------------------|----------------------------------------------------------------------|------------------------------------------------------|-------------|-------------------------------------|
| Psyllium<br>Intervention<br>(22)<br><br>[P=0.0468]      | non-serious<br>(22)                    | 18<br><br>[P=0.0155]                                                 | Cramping (3)                                         | 1           | 19<br><br>Unknown<br>3 <sup>c</sup> |
|                                                         |                                        |                                                                      | Constipation (3)                                     |             |                                     |
|                                                         |                                        |                                                                      | Struggle to swallow (3)                              |             |                                     |
|                                                         |                                        |                                                                      | Rhinovirus (2)                                       |             |                                     |
|                                                         |                                        |                                                                      | Excessive thirst (1)                                 |             |                                     |
|                                                         |                                        |                                                                      | Bloating (5)                                         |             |                                     |
|                                                         |                                        |                                                                      | Abdominal discomfort (2)                             |             |                                     |
|                                                         |                                        |                                                                      | Viral gastroenteritis (1)                            |             |                                     |
|                                                         |                                        |                                                                      | Belching (1)                                         |             |                                     |
|                                                         |                                        |                                                                      | Migraine (1)                                         |             |                                     |
|                                                         |                                        |                                                                      | Erratic bowel motions (1)                            |             |                                     |
|                                                         |                                        |                                                                      | Diarrhea (1)                                         |             |                                     |
|                                                         |                                        |                                                                      | Allergic Rash (1)                                    |             |                                     |
|                                                         |                                        |                                                                      | Rhinovirus (1)                                       |             |                                     |
| Kiwifruit<br>Intervention<br>(11)<br><br>[P=0.0468]     | non-serious<br>(10)<br><br>serious (1) | 7<br><br>[P=0.0155]                                                  | Post-Surgical Bacterial<br>Infection of the Knee (1) | 2           | 11                                  |
|                                                         |                                        |                                                                      | Viral Gastroenteritis (1)                            |             |                                     |
|                                                         |                                        |                                                                      | Bloating (2)                                         |             |                                     |
|                                                         |                                        |                                                                      | Diarrhea (2)                                         |             |                                     |
|                                                         |                                        |                                                                      | Constipation (1)                                     |             |                                     |
|                                                         |                                        |                                                                      | Heart burn (1)                                       |             |                                     |
|                                                         |                                        |                                                                      | Anxiety due to probiotic<br>withdrawal (1)           |             |                                     |
|                                                         |                                        |                                                                      | Rhinovirus (3)                                       |             |                                     |
|                                                         |                                        |                                                                      | Bacterial Infections and<br>Antibiotics (1)          |             |                                     |
|                                                         |                                        |                                                                      | Viral Gastroenteritis (1)                            |             |                                     |
| Wash-out (6)<br><br>Lead in (6)<br><br>Follow up (3)    | non-serious<br>(10)                    | 2                                                                    | Aspirin Gastritis (1)                                | 0           | 10                                  |
|                                                         |                                        |                                                                      | Urine tract infection (1)                            |             |                                     |
|                                                         |                                        |                                                                      | Internal Hemorrhoid (1)                              |             |                                     |
|                                                         |                                        |                                                                      | Passing a blood clot (1)                             |             |                                     |
|                                                         |                                        |                                                                      | Knee sprain (1)                                      |             |                                     |
|                                                         |                                        |                                                                      |                                                      |             |                                     |

<sup>a</sup> Values are presented as total counts. Multiple adverse events per person recorded.

<sup>b</sup> Unpaired t-test, n=73

<sup>c</sup> Participant ignored attempts for follow up and was ultimately withdrawn.
