# Supplementary material for: Two Gold Kiwifruit Daily for Effective Treatment of Constipation in Adults—A Randomized Clinical Trial
Source: MDPI journal article supplement (doi:10.3390/nu14194146), 2022-10-06
Supplement: s1 [file s1]

**Supplemental Table S1** Impact of Interventions on PROMIS and SAGIS scores post – pre-intervention

| Domain                        | Group    | SunGold® Kiwifruit    | BonVit® Psyllium     | P value<br>Factor (n = 54)            |                                          |                                         |
|-------------------------------|----------|-----------------------|----------------------|---------------------------------------|------------------------------------------|-----------------------------------------|
|                               |          |                       |                      | Effect of Interventions <sup>a)</sup> | Gold kiwifruit vs psyllium <sup>b)</sup> | Participant group effects <sup>c)</sup> |
| PROMIS Constipation           | Controls | -0.86 (1.46, -3.18)   | 0.08 (2.42, -2.26)   |                                       |                                          |                                         |
|                               | FC       | -7.04 (-3.08, -10.99) | -1.72 (2.28, -5.72)  | <b>F[1,51]=6.246, P=0.016*</b>        | F[1,51]=0.484, P=0.490                   | F[2,51]=2.238, P=0.117                  |
| PROMIS Diarrhea               | IBS-C    | 1.12 (5.07, -2.84)    | -2.10 (1.90, -6.10)  |                                       |                                          |                                         |
|                               | Controls | 2.17 (4.79, -0.46)    | 0.60 (2.72, -1.51)   |                                       |                                          |                                         |
|                               | FC       | 0.95 (5.42, -3.53)    | 1.97 (5.58, -1.63)   | <b>F[1,51]=7.834, P=0.007**</b>       | F[1,51]=0.628, P=0.432                   | F[2,51]=0.526, P=0.594                  |
| PROMIS Disrupted Swallowing   | IBS-C    | 4.98 (9.46, 0.50)     | 2.23 (5.83, -1.38)   |                                       |                                          |                                         |
|                               | Controls | -0.02 (1.76, -1.80)   | 0.39 (1.57, -0.78)   |                                       |                                          |                                         |
|                               | FC       | -1.26 (1.77, -4.30)   | -3.54 (-1.53, -5.54) | <b>F[1,51]=4.653, P=0.036*</b>        | F[1,51]=0.373, P=0.544                   | F[2,51]=2.968, P=0.060                  |
| PROMIS Belly Pain (n=48)      | IBS-C    | -2.73 (0.31, -5.76)   | 0.67 (2.67, -1.33)   |                                       |                                          |                                         |
|                               | Controls | 1.97 (5.23, -1.30)    | 0.67 (4.14, -2.80)   |                                       |                                          |                                         |
|                               | FC       | -2.62 (2.96, -8.19)   | -1.21 (4.70, -7.12)  | F[1,51]=0.175, P=0.678                | F[1,51]=0.093, P=0.761                   | F[2,51]=0.255, P=0.776                  |
| PROMIS Bloating (n=41)        | IBS-C    | 0.06 (5.64, -5.51)    | -1.73 (4.19, -7.64)  |                                       |                                          |                                         |
|                               | Controls | -2.33 (0.24, -4.90)   | 0.25 (2.62, -2.13)   |                                       |                                          |                                         |
|                               | FC       | -1.09 (3.97, -6.15)   | -2.55 (2.12, -7.22)  | F[1,45]=1.318, P=0.257                | F[1,45]=0.477, P=0.493                   | F[2,45]=0.483, P=0.620                  |
| PROMIS Nausea                 | IBS-C    | -1.03 (3.74, -5.80)   | 1.68 (6.08, -2.73)   |                                       |                                          |                                         |
|                               | Controls | 0.73 (3.34, -1.88)    | 1.04 (2.57, -0.48)   |                                       |                                          |                                         |
|                               | FC       | -1.25 (3.21, -5.70)   | 1.30 (3.90, -1.30)   | F[1,51]=0.857, P=0.359                | F[1,51]=3.917, P=0.053                   | F[2,51]=1.195, P=0.311                  |
| PROMIS Reflux                 | IBS-C    | -5.06 (-0.61, -9.51)  | -0.62 (1.98, -3.22)  |                                       |                                          |                                         |
|                               | Controls | 0.29 (1.88, -1.29)    | 0.66 (2.70, -1.38)   |                                       |                                          |                                         |
|                               | FC       | -3.06 (0.06, -6.17)   | -3.79 (0.22, -7.79)  | F[1,38]=2.638, P=0.113                | F[1,38]=2.295, P=0.138                   | F[2,38]=2.381, P=0.106                  |
| PROMIS Anxiety                | IBS-C    | -3.13 (-0.01, -6.24)  | 3.20 (7.20, -0.80)   |                                       |                                          |                                         |
|                               | Controls | -1.13 (1.38, -3.65)   | -1.01 (1.85, -3.87)  |                                       |                                          |                                         |
|                               | FC       | -1.00 (3.29, -5.29)   | -1.55 (3.33, -6.42)  | F[1,51]=3.265, P=0.077                | F[1,51]=0.016, P=0.899                   | F[2,51]=0.056, P=0.945                  |
| PROMIS Depression             | IBS-C    | -2.28 (2.01, -6.58)   | -1.18 (3.70, -6.06)  |                                       |                                          |                                         |
|                               | Controls | -0.91 (1.06, -2.87)   | -1.69 (0.45, -3.83)  |                                       |                                          |                                         |
|                               | FC       | -0.68 (2.67, -4.03)   | -1.32 (2.33, -4.97)  | F[1,51]=2.009, P=0.162                | F[1,51]=0.065, P=0.799                   | F[2,51]=0.051, P=0.951                  |
| SAGIS Epigastric Symptoms     | IBS-C    | 0.09 (3.44, -3.26)    | 0.37 (4.02, -3.28)   |                                       |                                          |                                         |
|                               | Controls | -0.01 (0.11, -0.13)   | 0.07 (0.20, -0.06)   |                                       |                                          |                                         |
|                               | FC       | -0.21 (0.00, -0.41)   | -0.22 (0.00, -0.44)  | <b>F[1,51]=10.001, P=0.003**</b>      | F[1,51]=0.015, P=0.903                   | F[2,51]=0.292, P=0.748                  |
| SAGIS Acid regurgitation /Gas | IBS-C    | -0.14 (0.06, -0.35)   | -0.18 (0.04, -0.40)  |                                       |                                          |                                         |
|                               | Controls | -0.02 (0.08, -0.12)   | 0.03 (0.11, -0.05)   |                                       |                                          |                                         |
|                               | FC       | -0.09 (0.08, -0.26)   | -0.15 (-0.02, -0.29) | <b>F[1,51]=11.478, P=0.001***</b>     | F[1,51]=0.996, P=0.323                   | F[2,51]=1.144, P=0.327                  |
| SAGIS IBS/ Diarrhea           | IBS-C    | -0.24 (-0.07, -0.41)  | -0.06 (0.07, -0.20)  |                                       |                                          |                                         |
|                               | Controls | 0.08 (0.20, -0.04)    | 0.02 (0.13, -0.10)   |                                       |                                          |                                         |
|                               | FC       | -0.14 (0.07, -0.34)   | 0.08 (0.27, -0.12)   | F[1,51]=0.000, P=0.982                | F[1,51]=0.018, P=0.892                   | F[2,51]=1.794, P=0.177                  |
| SAGIS Nausea/ Vomiting        | IBS-C    | 0.08 (0.28, -0.13)    | -0.11 (0.09, -0.30)  |                                       |                                          |                                         |
|                               | Controls | 0.08 (0.27, -0.11)    | 0.06 (0.17, -0.05)   |                                       |                                          |                                         |
|                               | FC       | -0.16 (0.16, -0.48)   | -0.16 (0.03, -0.35)  | F[1,51]=0.703, p=0.406                | F[1,51]=0.004, p=0.948                   | F[2,51]=0.006, p=0.994                  |
| SAGIS Constipation            | IBS-C    | -0.05 (0.27, -0.36)   | -0.05 (0.14, -0.24)  |                                       |                                          |                                         |
|                               | Controls | -0.02 (0.20, -0.23)   | 0.09 (0.31, -0.12)   |                                       |                                          |                                         |
|                               | FC       | -0.68 (-0.32, -1.05)  | -0.41 (-0.05, -0.77) | <b>F[1,51]=11.157, P=0.002**</b>      | F[1,51]=0.234, P=0.631                   | <b>F[2,51]=4.178, P=0.021*</b>          |
|                               | IBS-C    | 0.05 (0.41, -0.32)    | -0.50 (-0.14, -0.86) |                                       |                                          |                                         |

Data are presented as Δ-score = median (upper bound, lower bound 95% intervals) after subtraction of pre-intervention score from post-intervention score = relative shift from baseline. Δ-Scores were compared by two-way ANOVA. Bold data represent statistical significance. \*P<0.05, \*\*P<0.01, \*\*\*P≤0.001. FC, Functional Constipation, IBS-C, constipation-predominant Irritable Bowel Syndrome, SAGIS, Structured Assessment of Gastrointestinal Symptoms, PROMIS, Patient reported Outcome Measurement Information System. <sup>a)</sup> Combined effect of interventions on the relative shift from baseline; <sup>b)</sup> Kiwifruit vs psyllium = differences between the interventions on their effect on the relative shift; <sup>c)</sup> Participant group effects on the relative shift from baseline.
